# Supplementary material for: The Relationship Between Multidimensional Motivation and Endocrine-Related Responses: A Systematic Review
Source: PubMed Central journal article supplement (PMC8114335; doi:10.1177/1745691620958008), 2021-01-29
Supplement: sj-pdf-1-pps-10.1177_1745691620958008.pdf [file sj-pdf-1-pps-10.1177_1745691620958008.pdf]

## Supplemental Material

### *Search Terms*

Search ((((((((((((((((\*endocrin\*[Title/Abstract]) OR cortisol[Title/Abstract]) OR  
testosterone[Title/Abstract]) OR immunoglobulin\*[Title/Abstract]) OR  
"IgA"[Title/Abstract]) OR "IgG"[Title/Abstract]) OR "IgM"[Title/Abstract]) OR  
((hormon\*[Title/Abstract]) NOT ((therapy[Title/Abstract] OR treatment)[Title/Abstract])))  
AND Motiv\*[Title/Abstract])) OR ((((((((((((\*endocrin\*[Title/Abstract]) OR  
cortisol[Title/Abstract]) OR testosterone[Title/Abstract]) OR  
immunoglobulin\*[Title/Abstract]) OR "IgA"[Title/Abstract]) OR "IgG"[Title/Abstract]) OR  
"IgM"[Title/Abstract]) OR ((hormon\*[Title/Abstract]) NOT ((therapy[Title/Abstract] OR  
treatment)[Title/Abstract]))) AND Achievement goal\*[Title/Abstract])) OR  
(((((((((((((\*endocrin\*[Title/Abstract]) OR cortisol[Title/Abstract]) OR  
testosterone[Title/Abstract]) OR immunoglobulin\*[Title/Abstract]) OR  
"IgA"[Title/Abstract]) OR "IgG"[Title/Abstract]) OR "IgM"[Title/Abstract]) OR  
((hormon\*[Title/Abstract]) NOT ((therapy[Title/Abstract] OR treatment)[Title/Abstract])))  
AND (((self-determination[Title/Abstract]) OR "SDT"[Title/Abstract]) OR ("basic  
need\*[Title/Abstract]) OR "basic psychological need\*[Title/Abstract]))) OR  
(((((((((((((\*endocrin\*[Title/Abstract]) OR cortisol[Title/Abstract]) OR  
testosterone[Title/Abstract]) OR immunoglobulin\*[Title/Abstract]) OR  
"IgA"[Title/Abstract]) OR "IgG"[Title/Abstract]) OR "IgM"[Title/Abstract]) OR  
((hormon\*[Title/Abstract]) NOT ((therapy[Title/Abstract] OR treatment)[Title/Abstract])))  
AND (((entity belief\*[Title/Abstract]) OR entity view[Title/Abstract]) OR entity  
theor\*[Title/Abstract])) OR (((Incremental belief\*[Title/Abstract]) OR Incremental  
view[Title/Abstract]) OR Incremental theor\*[Title/Abstract]))) OR  
(((((((((((((\*endocrin\*[Title/Abstract]) OR cortisol[Title/Abstract]) OR  
testosterone[Title/Abstract]) OR immunoglobulin\*[Title/Abstract]) OR

"IgA"[Title/Abstract]) OR "IgG"[Title/Abstract]) OR "IgM"[Title/Abstract]) OR  
((hormon\*[Title/Abstract]) NOT ((therapy[Title/Abstract] OR treatment)[Title/Abstract])))  
AND self-efficacy[Title/Abstract])) OR ((((((((((endocrin\*[Title/Abstract]) OR  
cortisol[Title/Abstract]) OR testosterone[Title/Abstract]) OR  
immunoglobulin\*[Title/Abstract]) OR "IgA"[Title/Abstract]) OR "IgG"[Title/Abstract]) OR  
"IgM"[Title/Abstract]) OR ((hormon\*[Title/Abstract]) NOT ((therapy[Title/Abstract] OR  
treatment)[Title/Abstract]))) AND ((implicit power[Title/Abstract]) OR ((n  
power[Title/Abstract]) OR npower[Title/Abstract]))) NOT ((Animal[Title/Abstract] OR  
mammal[Title/Abstract] OR "rat"[Title/Abstract] OR "rats"[Title/Abstract] OR  
mice[Title/Abstract] OR fish[Title/Abstract] OR monkey[Title/Abstract] OR  
chicken[Title/Abstract] OR flower[Title/Abstract] OR worm[Title/Abstract]))

### *Risk of Bias*

| Item  | Description                                                                                                                                                    | Frequency x/41 |
|-------|----------------------------------------------------------------------------------------------------------------------------------------------------------------|----------------|
| 1.    | Is the hypothesis/aim/objective of the study clearly described?                                                                                                | 38             |
| 2.    | Are the main outcomes to be measured clearly described in the Introduction or Methods section?                                                                 | 41             |
| 3.    | Are the characteristics of the participants included in the study clearly described?                                                                           | 32             |
| 4.*   | Are the interventions of interest clearly described?                                                                                                           | 24/26          |
| 5.    | Are the main findings of the study clearly described?                                                                                                          | 35             |
| 6.    | Does the study provide estimates of the random variability in the data for the main outcomes?                                                                  | 36             |
| 7.    | Have actual probability values been reported for the main outcomes except where the probability value is less than 0.001?                                      | 24             |
| 8. *  | Was an attempt made to blind study subjects to the intervention they have received?                                                                            | 24/26          |
| 9. *  | Was an attempt made to blind those measuring the main outcomes of the intervention?                                                                            | 4/26           |
| 10.   | If any of the results of the study were based on data dredging, was this made clear?                                                                           | 38             |
| 11.   | Were the statistical tests used to assess the main outcomes appropriate?                                                                                       | 38             |
| 12.   | Were the main outcome measures used accurate (valid and reliable)?                                                                                             | 39             |
| 13.** | Did the study report the sample size required to detect a significant effect where the probability value for a difference being due to chance is less than 5%? | 5              |

\* Items 4, 8 and 9 relate only to the 26 experimental studies.

\*\* The wording of this item was amended slightly to assess reporting of power analysis, rather than whether the study had sufficient power, with studies scored yes (1) and no (0).
